# Supplementary material for: Application of Wastewater-Based Epidemiology for Tracking Human Exposure to Deoxynivalenol and Enniatins
Source: MDPI journal article supplement (doi:10.3390/toxins14020091), 2022-01-25
Supplement: s1 [file s1]

Supplementary Materials

# Application of Wastewater-Based Epidemiology for Tracking Human Exposure to Deoxynivalenol and Enniatins

Zane Berzina, Romans Pavlenko, Martins Jansons, Elena Bartkiene, Romans Neilands, Iveta Pugajeva and Vadims Bartkevics

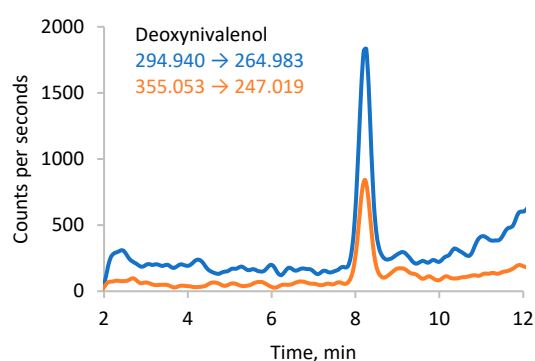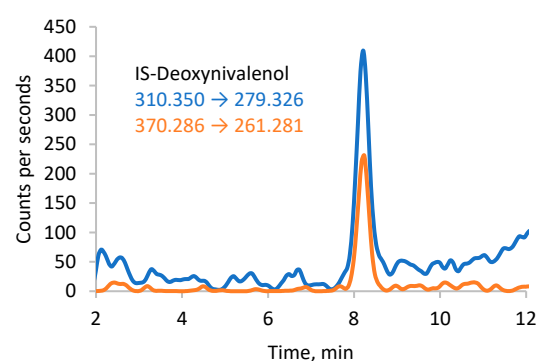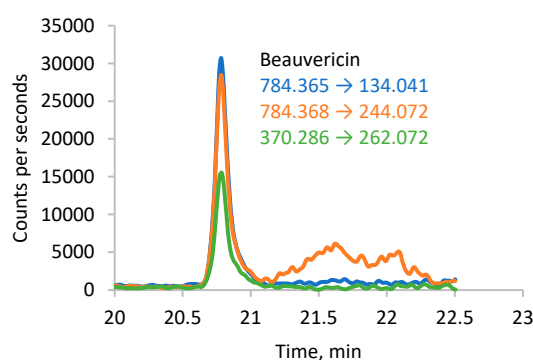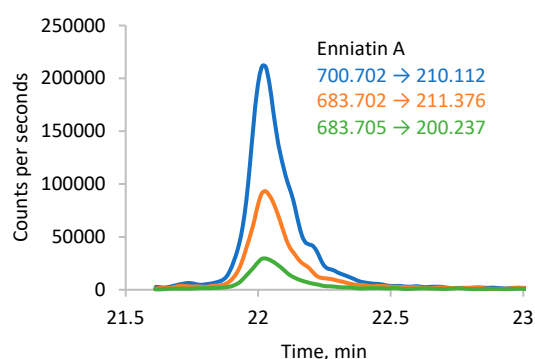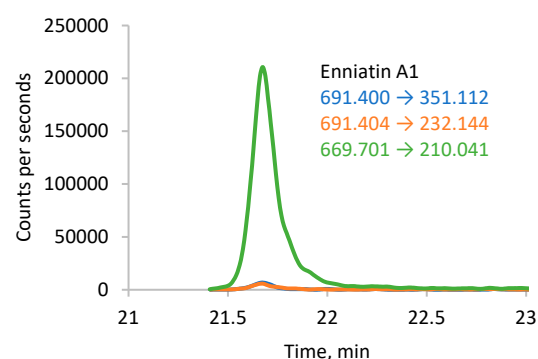

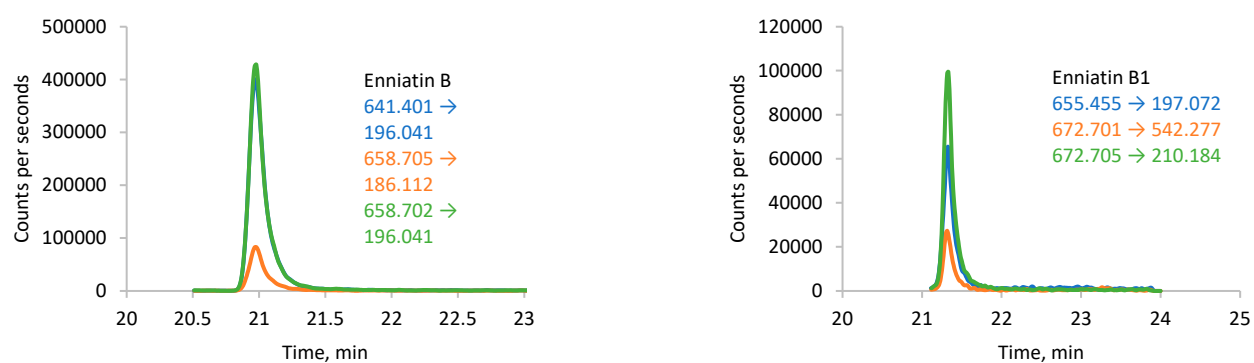

**Figure S1.** LC-MS/MS chromatograms from wastewater samples spiked with 5 ng/L for BEA and ENNs', 50 ng/L for DON, and 20 ng/L for IS-DON.

**Table S1.** Absolute SPE recoveries of mycotoxins in Milli-Q water standard addition concentration 5ng/L for ENN group and BEA, 25 ng/L for DON.

|            | C-18 (%) | STRATA-X (%) | HLB (%) |
|------------|----------|--------------|---------|
| DON        | 9        | 94           | 94      |
| BEA        | 59       | 90           | 75      |
| ENNA       | 67       | 104          | 92      |
| ENNA1      | 71       | 103          | 82      |
| ENNB       | 72       | 106          | 76      |
| ENNB1      | 72       | 106          | 78      |
| Min. value | 9        | 90           | 75      |
| Max. value | 72       | 106          | 94      |
| Median     | 69       | 104          | 80      |

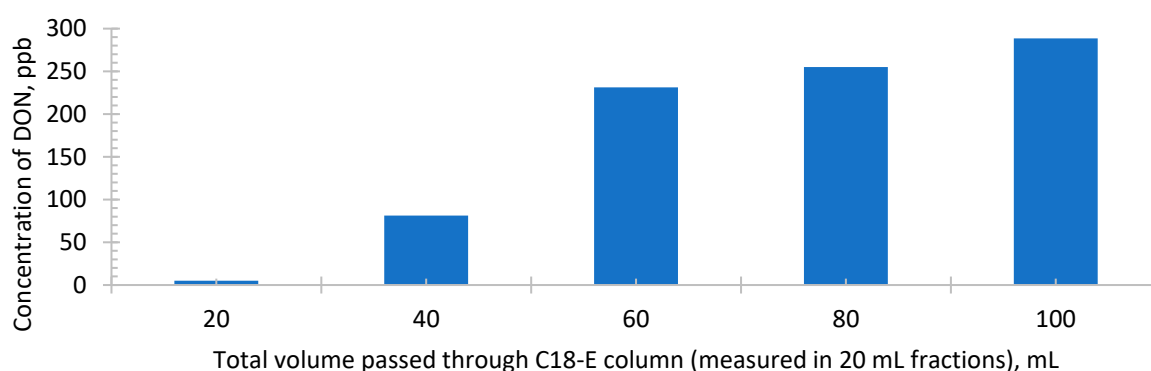**Figure S2.** Poor DON recovery is explained by the inability of DON to sorb on the C18 column.**Table S2.** Ion suppression of mycotoxins in various wastewater extracts.

|       | Sample 1 (%) | Sample 2 (%) | Sample 3 (%) | Average (%) | RSD % |
|-------|--------------|--------------|--------------|-------------|-------|
| DON   | 8            | -            | -            | -           | -     |
| BEA   | -96          | -78          | -91          | -88         | 11    |
| ENNA  | -40          | -24          | -51          | -38         | 35    |
| ENNA1 | -75          | -51          | -56          | -61         | 21    |
| ENNB  | -65          | -49          | -70          | -61         | 18    |
| ENNB1 | -67          | -38          | -64          | -56         | 28    |

**Table S3.** Absolute method recoveries and method precision (MP) for DON.

|     | Concentration (ng/L) | Abs. Method Recov. (%) | Abs. Method Recov. (%) (n) | Abs. Method Recov. (%) Median | MP (%) | Rel. Method Recov. (%) | Rel. Method Recov. (%) (n) | Rel. Method Recov. (%) Median |
|-----|----------------------|------------------------|----------------------------|-------------------------------|--------|------------------------|----------------------------|-------------------------------|
|     |                      | Min-Max                | Average                    |                               |        | Min-Max                | Average                    |                               |
| DON | 5                    | 84-122                 | 97 (5)                     | 93                            | 6      | 60-120                 | 109 (5)                    | 102                           |
|     | 25                   |                        |                            |                               |        | 72-109                 | 90 (4)                     | 90                            |
|     | 50                   | 99 - 118               | 106 (5)                    | 104                           |        | 92-116                 | 103 (7)                    | 104                           |
|     | 100                  |                        |                            |                               |        |                        | 96 (1)                     | 96                            |
|     | 200                  | 99 - 118               | 112 (5)                    | 115                           |        | 112-113                | 113 (2)                    | 113                           |

**Table S4.** Absolute method recoveries and method precision (MP) for BEA and enniatins.

|             | Concentration<br>(ng/L) | Number of<br>Measurements | Abs. Method<br>Recov. (%)<br>Min-Max | Abs. Method<br>Recov. (%)<br>Average | Abs. Method<br>Recov. (%)<br>Median | MP (%) |
|-------------|-------------------------|---------------------------|--------------------------------------|--------------------------------------|-------------------------------------|--------|
| BEA         | 0,5                     | 5                         | 27-64                                | 50                                   | 57                                  | 7      |
|             | 5                       | 5                         | 94-115                               | 104                                  | 101                                 |        |
|             |                         | 5                         | 54-96                                | 84                                   | 93                                  |        |
|             | 10                      | 3                         | 71-152                               | 100                                  | 78                                  |        |
|             |                         | 5                         | 43-111                               | 70                                   | 66                                  |        |
| ENNA        | 0,5                     | 5                         | 57-126                               | 75                                   | 63                                  | 3      |
|             | 5                       | 5                         | 94-103                               | 98                                   | 97                                  |        |
|             |                         | 5                         | 74-99                                | 89                                   | 89                                  |        |
|             | 10                      | 3                         | 39-169                               | 100                                  | 92                                  |        |
|             |                         | 5                         | 46-109                               | 79                                   | 88                                  |        |
| ENNA1       | 0,5                     | 5                         | 76-120                               | 92                                   | 87                                  | 4      |
|             | 5                       | 5                         | 94-105                               | 100                                  | 98                                  |        |
|             |                         | 5                         | 109-128                              | 118                                  | 116                                 |        |
|             | 10                      | 3                         | 45-131                               | 100                                  | 124                                 |        |
|             |                         | 5                         | 50-131                               | 110                                  | 126                                 |        |
| ENNB        | 0,5                     | 5                         | 59-134                               | 93                                   | 92                                  | 1,3    |
|             | 5                       | 5                         | 98-102                               | 100                                  | 100                                 |        |
|             |                         | 5                         | 86-127                               | 114                                  | 118                                 |        |
|             | 10                      | 3                         | 69-153                               | 100                                  | 78                                  |        |
|             |                         | 5                         | 56-132                               | 103                                  | 114                                 |        |
| ENNB1       | 0,5                     | 5                         | 70-127                               | 100                                  | 103                                 | 3      |
|             | 5                       | 5                         | 94-105                               | 100                                  | 100                                 |        |
|             |                         | 5                         | 100-138                              | 119                                  | 116                                 |        |
|             | 10                      | 3                         | 64-164                               | 100                                  | 72                                  |        |
|             |                         | 5                         | 57-133                               | 105                                  | 110                                 |        |
| Min. -Value | 0,5/5/10                |                           | 27/54/39                             | 50                                   | 57                                  | 1,3    |
| Max. Value  | 0,5/5/10                |                           | 134/138/169                          | 119                                  | 126                                 | 7      |

**Table S5.** Instrument detection limits (IDL) and method detection limit (MDL) and method limit of quantification (MLOQ).

|            | IDL (ng/L) | MDL (ng/L) | MLOQ (ng/L) | Linearity (ng/L) | Correlation Factor (R <sup>2</sup> ) |
|------------|------------|------------|-------------|------------------|--------------------------------------|
| DON        | 0,18       | 1,9        | 6,4         | 2,5-200          | 0,998                                |
| BEA        | 0,0025     | 0,039      | 0,13        | 0,5-25           | 0,991                                |
| ENNA       | 0,0102     | 0,12       | 0,40        |                  | 0,987                                |
| ENNA1      | 0,0089     | 0,14       | 0,47        |                  | 0,999                                |
| ENNB       | 0,0055     | 0,044      | 0,15        |                  | 0,991                                |
| ENNB1      | 0,0170     | 0,13       | 0,43        |                  | 0,996                                |
| Min. value | 0,0025     | 0,039      | 0,13        |                  |                                      |
| Max. value | 0,170      | 0,14       | 0,47        |                  |                                      |

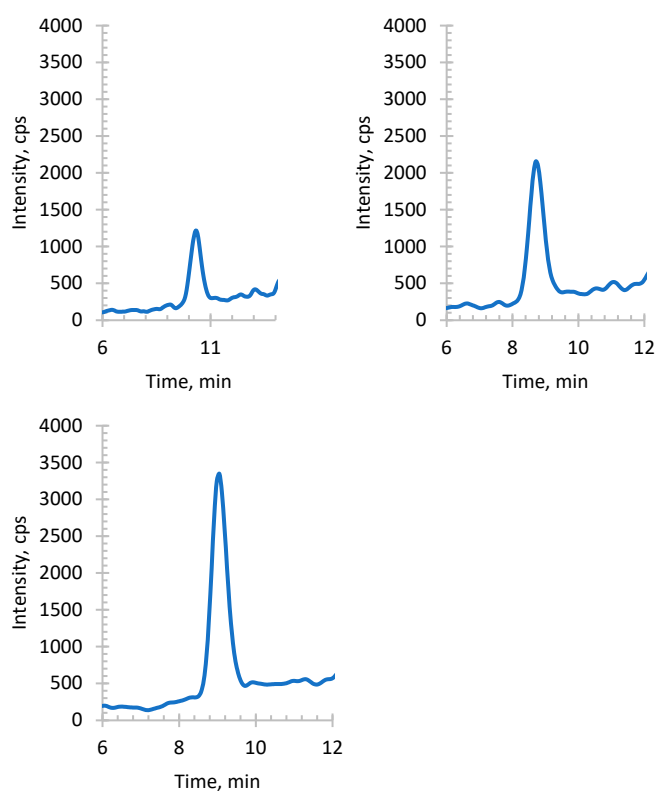

**Figure S3.** DON peak intensity changes depending on the selected sample volume – 333 mL, 666 mL and 1000 mL.

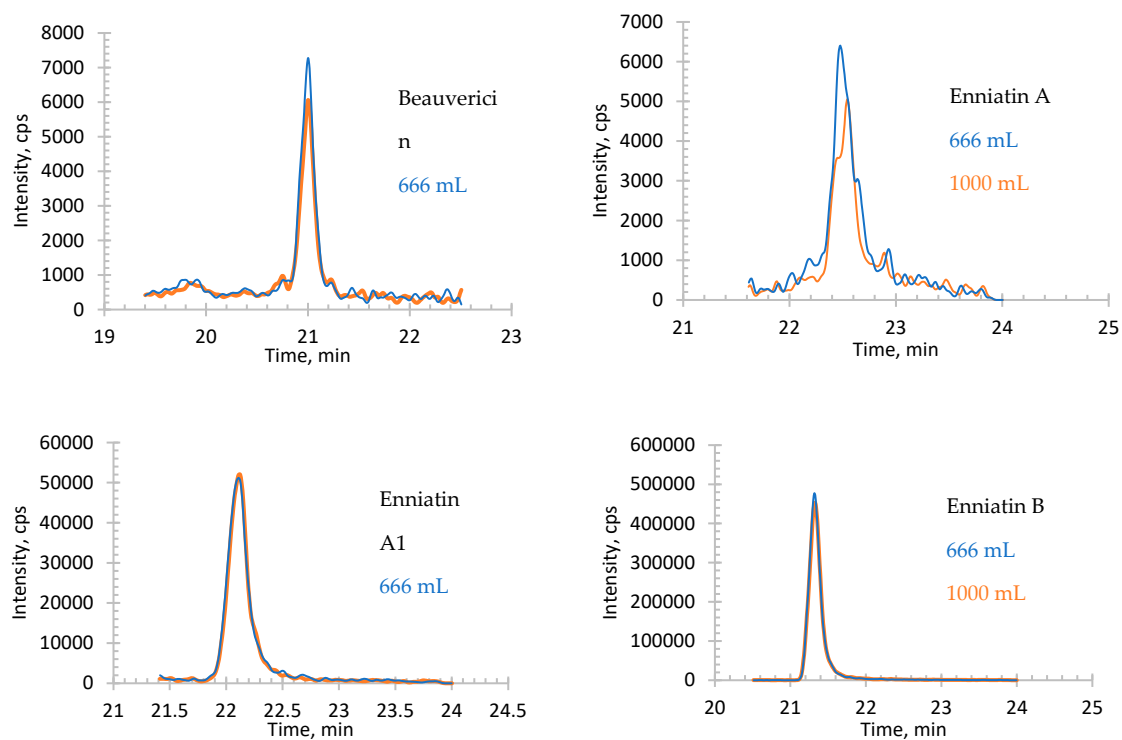

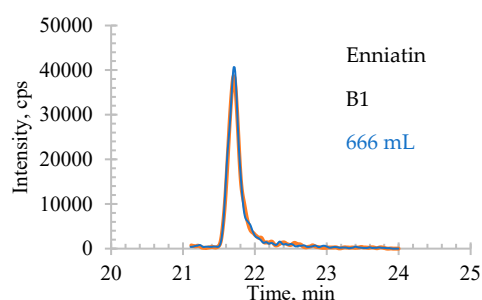

**Figure S4.** BEA and ENN group mycotoxin peak intensity changes depending on the selected sample volume – 666 mL and 1000 mL.

**Table S6.** Analytical conditions used in the analysis of the mycotoxins and ILIS.

| Compound Name            | Retention Time, min | Adduct   | Precursor Ion m/z | Product Ion m/z | Collision Energy, eV |
|--------------------------|---------------------|----------|-------------------|-----------------|----------------------|
| Deoxynivalenol           | 8.20                | [M-H]-   | 294.940           | 264.982         | 10.25                |
|                          |                     | [M+Ac]-  | 355.053           | 247.018         | 14.90                |
| U-[13C15]-Deoxynivalenol | 8.21                | [M-H]-   | 310.350           | 279.325         | 10.25                |
| Beauvericin              | 20.8                | [M+H]+   | 784.365           | 134.040         | 52.67                |
|                          |                     | [M+H]+   | 784.368           | 244.071         | 25.83                |
|                          |                     | [M+NH4]+ | 801.392           | 262.071         | 29.16                |
| Enniatin A               | 22.0                | [M+H]+   | 683.702           | 211.375         | 25.37                |
|                          |                     | [M+H]+   | 683.705           | 200.236         | 39.48                |
|                          |                     | [M+NH4]+ | 700.702           | 210.111         | 30.68                |
| Enniatin A1              | 21.7                | [M+H]+   | 669.701           | 210.040         | 24.16                |
|                          |                     | [M+Na]+  | 691.40            | 351.111         | 51.06                |
|                          |                     | [M+Na]+  | 691.404           | 232.143         | 55.00                |
| Enniatin B               | 21.0                | [M+H]+   | 641.401           | 196.040         | 24.36                |
|                          |                     | [M+NH4]+ | 658.702           | 196.040         | 29.82                |
|                          |                     | [M+NH4]+ | 658.705           | 186.111         | 44.43                |
| Enniatin B1              | 21.3                | [M+H]+   | 655.455           | 197.071         | 23.80                |
|                          |                     | [M+NH4]+ | 672.701           | 542.276         | 27.60                |
|                          |                     | [M+NH4]+ | 672.705           | 210.183         | 29.72                |

**Table S7.** Stability of mycotoxins in wastewater calculated as percentage of the concentrations measured at  $t_0$  (Immediately after the spiking DON 50 ng/L, BEA and ENN group 5 ng/L).

| Compound | Difference after 2 Weeks at 4°C (%) | Difference after 3 Weeks at 4°C (%) | Difference after 2 Weeks at -18°C (%) | Difference after 3 Weeks at -18°C (%) |
|----------|-------------------------------------|-------------------------------------|---------------------------------------|---------------------------------------|
| DON      | -2,2                                | Not Tested                          | -13                                   | Not tested                            |
| BEA      | -35                                 | -35                                 | -47                                   | -41                                   |
| ENNA     | -41                                 | -31                                 | -25                                   | -11                                   |
| ENNA1    | -9                                  | +24                                 | -71*                                  | -19                                   |
| ENNB     | +3                                  | +10                                 | -15                                   | +4                                    |
| ENNB1    | +5                                  | 0                                   | -15                                   | +24                                   |

\*Assumed as random error

Table S8. Mycotoxins found in wastewater.

| Region              | Targeted Compounds                                                                                     | Number of Samples             | Positive Samples % | Min – max, ng/L | Mean, ng/L | Method Detection Limit (MDL) ng/L | Reference |
|---------------------|--------------------------------------------------------------------------------------------------------|-------------------------------|--------------------|-----------------|------------|-----------------------------------|-----------|
| Zurich, Switzerland | Beauvericin                                                                                            | 4                             | 100                | < MDL           | -          | 3.4                               | 1         |
|                     | Deoxynivalenol                                                                                         |                               | 100                | 16.4 – 38.8     | 26.1       | 1.2                               |           |
|                     | 3-acetyl-deoxynivalenol                                                                                |                               | 100                | < MDL           | -          | 6                                 |           |
|                     | Aflatoxin B1,G1,B2,G2,M1                                                                               |                               | 0                  | Not detected    |            | 2.3, 2.1, 6.9, 5.2, 5.1           |           |
|                     | Altenuene, alternariol monomethylether, alternariol, tentoxin                                          |                               |                    |                 |            | 7, 1.7, 1.4, 3.6                  |           |
|                     | Ergocornine, ergocryptine                                                                              |                               |                    |                 |            | 3.9, 2                            |           |
|                     | Fumonisin B1, B2+3                                                                                     |                               |                    |                 |            | 6.5, 6                            |           |
|                     | Ochratoxin A , B                                                                                       |                               |                    |                 |            | 0.8, 0.7                          |           |
|                     | Sterigmatocystin, sulochrin                                                                            |                               |                    |                 |            | 4, 47.7                           |           |
|                     | Citrinine, patulin                                                                                     |                               |                    |                 |            | 0.4, 2.5                          |           |
|                     | α, β - zearalenol, Zearalenone                                                                         |                               |                    |                 |            | 21.5, 31.1, 12.9                  |           |
|                     | Diacetoxyscirpenol, HT-2 toxin, neosolaniol, T-2 toxin, verrucaric A                                   |                               |                    |                 |            | 0.5, 4.8, 5.5, 1.2, 10.2          |           |
|                     | 3-acetyl-deoxynivalenol                                                                                |                               |                    |                 |            | 6, n.a.,0.7, 1.6                  |           |
|                     | 15- acetyl-deoxynivalenol                                                                              |                               |                    |                 |            |                                   |           |
| Fusarenone-X        |                                                                                                        |                               |                    |                 |            |                                   |           |
| Nivalenol           |                                                                                                        |                               |                    |                 |            |                                   |           |
| Italy               | Deoxynivalenol                                                                                         | 15 from two different regions | 100                | -               | 33.7       | 10.4                              | 2         |
|                     | Fumonisin B1                                                                                           |                               | 100                | -               | 44         | 2.0                               |           |
|                     | Fumonisin B2                                                                                           |                               | 100                | -               | 4.6        | 0.5                               |           |
|                     | Fumonisin B3                                                                                           |                               | 100                | <LOQ-...        | 3.6        | 3.3                               |           |
|                     | Deepoxydeoxynivalenol (DOM-1), 3-acetyl-deoxynivalenol, 15-acetyl-deoxynivalenol, nivalenol, T-2 toxin |                               | 0                  | Not detected    | -          | 11.6, 20.0, 25.3, 98.0, 1.0,      |           |
|                     | Zearalenone, β - zearalenol                                                                            |                               |                    |                 |            | 7.6, 8.9                          |           |
|                     |                                                                                                        |                               |                    |                 |            |                                   |           |
| Spain               | Deoxynivalenol                                                                                         | 14 from two different regions | 100                | 32-46           | 39.4       | 10.4                              | 2         |
|                     | Fumonisin B1                                                                                           |                               | 0                  | Not detected    | -          | 2.0                               |           |
|                     | Fumonisin B2                                                                                           |                               | 0                  | Not detected    | -          | 0.5                               |           |
|                     | Fumonisin B3                                                                                           |                               | 50                 | -               | 1.9        | 3.3                               |           |
|                     | Deepoxydeoxynivalenol (DOM-1), 3-acetyl-deoxynivalenol, 15-                                            |                               | 0                  | Not detected    | -          | 11.6, 20.0, 25.3, 98.0, 1.0,      |           |

|               |                                                |                                                                        |     |                 |                                                                      |                              |   |
|---------------|------------------------------------------------|------------------------------------------------------------------------|-----|-----------------|----------------------------------------------------------------------|------------------------------|---|
|               | acetyl-deoxynivalenol,<br>nivalenol, T-2 toxin |                                                                        |     |                 |                                                                      |                              |   |
|               | Zearalenone, $\beta$ -<br>zearalenol           |                                                                        |     |                 |                                                                      | 7.6, 8.9                     |   |
| Poland        | Zearalenone                                    | Monthly for<br>13 months                                               | -   | -               | 5.0<br>(autumn/winter<br>period)<br>1.0<br>(spring/summer<br>period) | 0.5                          | 3 |
| Poland        | Zearalenone                                    | Monthly<br>from March<br>to<br>December<br>for 3 years<br>(2010-2012). | 100 | 0.33-19.80      | 4.1                                                                  | 0.3                          | 4 |
| Switzerland   | Deoxynivalenol                                 | 14 from two<br>different<br>regions                                    | 100 | 37-122          | 51-113                                                               | 3.0                          | 5 |
| Switzerland   | 3-acetyl-deoxynivalenol                        | 411                                                                    | 19  | <LOQ-<br>367.5  | 46                                                                   | 5.5                          | 6 |
|               | Deoxynivalenol                                 |                                                                        | 54  | <LOQ-<br>1114.5 | 75                                                                   | 0.8                          |   |
|               | Nivalenol                                      |                                                                        | 44  | 5.0-71.3        | 13                                                                   | 1.7                          |   |
|               | Beauvericin                                    |                                                                        | 36  | <LOQ-10.4       | 2.3                                                                  | 1.4                          |   |
|               | Zearalenone                                    |                                                                        | 14  | <LOQ-48.4       | 12.6                                                                 | 6.0                          |   |
| United States | 3-acetyl-deoxynivalenol                        | 3 from three<br>different<br>regions                                   | 55  | <LOQ –<br>44.8  | 18                                                                   | <6.0                         | 7 |
|               | Beauvericin                                    |                                                                        | 89  | <LOQ            | -                                                                    | <3.4                         |   |
|               | Deoxynivalenol                                 |                                                                        | 56  | < LOQ –<br>75.4 | 24.5                                                                 | <1.3                         |   |
|               | Nivalenol                                      |                                                                        | 33  | <LOQ            | -                                                                    | (<1.5-<1.6)                  |   |
|               | $\alpha$ - zearalenol                          |                                                                        | 22  | <LOQ-817        | 287.4                                                                | (<18.6-<br><21.5)            |   |
|               | $\beta$ - zearalenol                           |                                                                        | 22  | <LOQ-<br>1828   | 301.6                                                                | (<4.9-<31.1)                 |   |
|               | Zearalenone                                    |                                                                        | 44  | <LOQ            | -                                                                    | (<12.3-<br><12.9)            |   |
|               | Diacetoxyscirpenol,<br>verrucarin A,           |                                                                        | 0   | -               | -                                                                    | (<0.4-<0.5),<br>(<1.4-<10.2) |   |

Means were calculated using LOQ/2 when the values were below LOQ, if there wasn't any other information.



**Table S9.** DON intake estimates from different studies.

| Country           | Method                                                             | Respondents | Average, ng/kg<br>b.w./day | Min,<br>ng/kg<br>b.w./day | Max,<br>ng/kg<br>b.w./day | Reference |
|-------------------|--------------------------------------------------------------------|-------------|----------------------------|---------------------------|---------------------------|-----------|
| Tanzania          | Urinary biomarker                                                  | 166 kids    | 151                        | 47                        | 376                       | 8         |
| Sweden            | Urinary biomarker                                                  | 1044 pupils | 78                         | 46                        | 110                       | 9         |
| Norway            | Urinary biomarker                                                  | 257         | 390                        | 50                        | 730                       | 10        |
| Norway            | Occurrence data during<br>years 2008-2011 of grain-<br>based foods | 257         | 363                        | 220                       | 730                       | 10        |
| Italy             | Wastewater based<br>epidemiology                                   | 29 samples  | 200                        | 129                       | 257                       | 2         |
| United<br>Kingdom | Urinary biomarker                                                  | 35          | 298                        | 8                         | 1046                      | 11        |
| South Korea       | Occurrence data and @Risk<br>program calculations                  | 74 samples  | 105                        | 66                        | 144                       | 12        |

Table S10. Mycotoxins found in wastewater.

| Sampling date | DON, ng/L | ENNA, ng/L | ENNA1, ng/L | ENNB, ng/L | ENNB1, ng/L | BEA, ng/L | 5-HIAA, ng/L |
|---------------|-----------|------------|-------------|------------|-------------|-----------|--------------|
| 29.06.2021    | 49.50     | 0.20       | 0.235       | 2.02       | 1.44        | ND        | 15690        |
| 30.06.2021    | 52.86     | 2.00       | 0.235       | 3.41       | 2.77        | ND        | 16190        |
| 01.07.2021    | 45.48     | 0.20       | 2.10        | 4.06       | 2.52        | ND        | 19190        |
| 02.07.2021    | 47.20     | 2.00       | 1.35        | 7.05       | 3.24        | ND        | 17340        |
| 05.07.2021    | 64.82     | 0.83       | 0.235       | 3.75       | 5.55        | ND        | 12120        |
| 06.07.2021    | 52.18     | 1.50       | 2.50        | 4.98       | 2.47        | ND        | 14770        |
| 07.07.2021    | 56.72     | 1.45       | 1.47        | 9.94       | 3.64        | ND        | 14160        |
| 08.07.2021    | 50.66     | 1.47       | 0.235       | 4.44       | 3.75        | ND        | 12530        |
| 09.07.2021    | 56.63     | 0.20       | 2.86        | 0.64       | 4.79        | ND        | 15760        |
| 12.07.2021    | 76.84     | 0.70       | 0.62        | 2.40       | 1.72        | ND        | 17520        |
| 13.07.2021    | 67.63     | 1.04       | 1.34        | 3.40       | 2.45        | ND        | 13230        |
| 14.07.2021    | 76.85     | 1.59       | 2.74        | 7.05       | 4.37        | ND        | 13500        |
| 15.07.2021    | 54.68     | 2.55       | 6.69        | 6.17       | 6.10        | ND        | 8680         |
| 16.07.2021    | 60.12     | 2.41       | 4.08        | 5.99       | 9.15        | ND        | 11010        |
| 19.07.2021    | 55.03     | 2.69       | 2.28        | 4.06       | 3.44        | <LOQ      | 15058        |
| 20.07.2021    | 27.86     | 3.09       | 2.52        | 3.00       | 2.36        | ND        | 14331        |
| 21.07.2021    | 56.27     | 3.24       | 4.87        | 3.63       | 2.01        | ND        | 12789        |
| 22.07.2021    | 23.23     | 7.44       | 4.32        | 4.66       | 3.77        | ND        | 12311        |
| 23.07.2021    | 49.29     | 4.29       | 7.12        | 4.93       | 4.08        | ND        | 15356        |
| 26.07.2021    | 54.68     | 5.65       | 12.4        | 7.72       | 10.1        | ND        | 11430        |
| 27.07.2021    | 69.18     | 16.7       | 27.7        | 7.43       | 5.60        | <LOQ      | 16891        |
| 28.07.2021    | 38.07     | 6.45       | 4.85        | 3.39       | 3.47        | ND        | 12488        |
| 29.07.2021    | 31.98     | 3.76       | 3.96        | 2.63       | 2.84        | <LOQ      | 11491        |
| 30.07.2021    | 35.86     | 6.47       | 5.93        | 6.78       | 5.55        | <LOQ      | 16581        |
| 02.08.2021    | 34.38     | 1.63       | 6.29        | 2.98       | 3.13        | ND        | 12443        |
| 03.08.2021    | 43.91     | 2.25       | 8.56        | 4.73       | 4.82        | ND        | 17139        |
| 04.08.2021    | 58.81     | 1.41       | 1.64        | 4.10       | 3.02        | ND        | 17168        |
| 05.08.2021    | 46.60     | 1.50       | 1.58        | 5.16       | 3.16        | ND        | 16647        |
| 06.08.2021    | 62.28     | 1.05       | 1.21        | 3.75       | 2.95        | ND        | 19481        |

Table S11. Estimated daily intake of DON mg/day per person.

| Sampling date | DI of DON, mg/day per person | DI of ENNA, µg/day per person, depending on the provisional excretion factor |        |       | DI of ENNA1, µg/day per person, depending on the provisional excretion factor |        |       | DI of ENNB, µg/day per person, depending on the provisional excretion factor |        |       | DI of ENNB1, µg/day per person, depending on the provisional excretion factor |        |       |
|---------------|------------------------------|------------------------------------------------------------------------------|--------|-------|-------------------------------------------------------------------------------|--------|-------|------------------------------------------------------------------------------|--------|-------|-------------------------------------------------------------------------------|--------|-------|
|               |                              | CF 5%                                                                        | CF 25% | CF50% | CF 5%                                                                         | CF 25% | CF50% | CF 5%                                                                        | CF 25% | CF50% | CF 5%                                                                         | CF 25% | CF50% |
| 29.06.2021    | 0,020                        | 1,06                                                                         | 0,21   | 0,11  | 1,25                                                                          | 0,25   | 0,12  | 10,7                                                                         | 2,14   | 1,07  | 7,64                                                                          | 1,53   | 0,76  |
| 30.06.2021    | 0,020                        | 10,3                                                                         | 2,06   | 1,03  | 1,21                                                                          | 0,24   | 0,12  | 17,5                                                                         | 3,50   | 1,75  | 14,2                                                                          | 2,85   | 1,42  |
| 01.07.2021    | 0,015                        | 0,87                                                                         | 0,17   | 0,09  | 9,10                                                                          | 1,82   | 0,91  | 17,6                                                                         | 3,52   | 1,76  | 10,9                                                                          | 2,19   | 1,09  |
| 02.07.2021    | 0,017                        | 9,60                                                                         | 1,92   | 0,96  | 6,48                                                                          | 1,30   | 0,65  | 33,8                                                                         | 6,77   | 3,38  | 15,5                                                                          | 3,11   | 1,55  |
| 05.07.2021    | 0,033                        | 5,70                                                                         | 1,14   | 0,57  | 1,61                                                                          | 0,32   | 0,16  | 25,7                                                                         | 5,15   | 2,57  | 38,1                                                                          | 7,62   | 3,81  |
| 06.07.2021    | 0,022                        | 8,45                                                                         | 1,69   | 0,84  | 14,1                                                                          | 2,82   | 1,41  | 28,1                                                                         | 5,61   | 2,81  | 13,9                                                                          | 2,78   | 1,39  |
| 07.07.2021    | 0,025                        | 8,52                                                                         | 1,70   | 0,85  | 8,64                                                                          | 1,73   | 0,86  | 58,4                                                                         | 11,7   | 5,84  | 21,4                                                                          | 4,28   | 2,14  |
| 08.07.2021    | 0,025                        | 9,76                                                                         | 1,95   | 0,98  | 1,56                                                                          | 0,31   | 0,16  | 29,5                                                                         | 5,90   | 2,95  | 24,9                                                                          | 4,98   | 2,49  |
| 09.07.2021    | 0,022                        | 1,06                                                                         | 0,21   | 0,11  | 15,1                                                                          | 3,02   | 1,51  | 3,38                                                                         | 0,68   | 0,34  | 25,3                                                                          | 5,06   | 2,53  |

|            |              |             |             |             |             |             |             |             |             |             |             |             |             |
|------------|--------------|-------------|-------------|-------------|-------------|-------------|-------------|-------------|-------------|-------------|-------------|-------------|-------------|
| 12.07.2021 | 0,027        | 3,32        | 0,66        | 0,33        | 2,94        | 0,59        | 0,29        | 11,4        | 2,28        | 1,14        | 8,17        | 1,63        | 0,82        |
| 13.07.2021 | 0,032        | 6,54        | 1,31        | 0,65        | 8,43        | 1,69        | 0,84        | 21,4        | 4,28        | 2,14        | 15,4        | 3,08        | 1,54        |
| 14.07.2021 | 0,036        | 9,80        | 1,96        | 0,98        | 16,9        | 3,38        | 1,69        | 43,5        | 8,69        | 4,34        | 26,9        | 5,39        | 2,69        |
| 15.07.2021 | 0,039        | 24,4        | 4,89        | 2,44        | 64,1        | 12,8        | 6,41        | 59,1        | 11,8        | 5,91        | 58,5        | 11,7        | 5,85        |
| 16.07.2021 | 0,034        | 18,2        | 3,64        | 1,82        | 30,8        | 6,17        | 3,08        | 45,3        | 9,05        | 4,53        | 69,1        | 13,8        | 6,91        |
| 19.07.2021 | 0,023        | 14,9        | 2,97        | 1,49        | 12,6        | 2,52        | 1,26        | 22,4        | 4,48        | 2,24        | 19,0        | 3,80        | 1,90        |
| 20.07.2021 | 0,012        | 17,9        | 3,59        | 1,80        | 14,7        | 2,93        | 1,46        | 17,4        | 3,48        | 1,74        | 13,7        | 2,74        | 1,37        |
| 21.07.2021 | 0,027        | 21,1        | 4,21        | 2,11        | 31,7        | 6,33        | 3,17        | 23,6        | 4,72        | 2,36        | 13,1        | 2,61        | 1,31        |
| 22.07.2021 | 0,012        | 50,3        | 10,1        | 5,03        | 29,2        | 5,83        | 2,92        | 31,5        | 6,30        | 3,15        | 25,5        | 5,09        | 2,55        |
| 23.07.2021 | 0,020        | 23,3        | 4,65        | 2,33        | 38,6        | 7,71        | 3,86        | 26,7        | 5,34        | 2,67        | 22,1        | 4,42        | 2,21        |
| 26.07.2021 | 0,030        | 41,1        | 8,23        | 4,11        | 90,6        | 18,1        | 9,06        | 56,2        | 11,2        | 5,62        | 73,6        | 14,7        | 7,36        |
| 27.07.2021 | 0,026        | 82,3        | 16,5        | 8,23        | 136         | 27,3        | 13,6        | 36,6        | 7,32        | 3,66        | 27,6        | 5,52        | 2,76        |
| 28.07.2021 | 0,019        | 42,9        | 8,60        | 4,30        | 32,3        | 6,46        | 3,23        | 22,6        | 4,52        | 2,26        | 23,1        | 4,62        | 2,31        |
| 29.07.2021 | 0,017        | 27,2        | 5,45        | 2,72        | 28,7        | 5,74        | 2,87        | 19,1        | 3,81        | 1,91        | 20,6        | 4,11        | 2,06        |
| 30.07.2021 | 0,013        | 32,5        | 6,49        | 3,25        | 29,8        | 5,95        | 2,98        | 34,0        | 6,81        | 3,40        | 27,9        | 5,57        | 2,79        |
| 02.08.2021 | 0,017        | 10,9        | 2,18        | 1,09        | 42,1        | 8,41        | 4,21        | 19,9        | 3,99        | 1,99        | 20,9        | 4,19        | 2,09        |
| 03.08.2021 | 0,016        | 10,9        | 2,18        | 1,09        | 41,6        | 8,31        | 4,16        | 22,9        | 4,59        | 2,30        | 23,4        | 4,68        | 2,34        |
| 04.08.2021 | 0,021        | 6,83        | 1,37        | 0,68        | 7,95        | 1,59        | 0,79        | 19,9        | 3,97        | 1,99        | 14,6        | 2,93        | 1,46        |
| 05.08.2021 | 0,017        | 7,50        | 1,50        | 0,75        | 7,90        | 1,58        | 0,79        | 25,8        | 5,16        | 2,58        | 15,8        | 3,16        | 1,58        |
| 06.08.2021 | 0,020        | 4,48        | 0,90        | 0,45        | 5,17        | 1,03        | 0,52        | 16,0        | 3,20        | 1,60        | 12,6        | 2,52        | 1,26        |
| Average:   | <b>0,023</b> | <b>17,6</b> | <b>3,53</b> | <b>1,76</b> | <b>25,2</b> | <b>5,04</b> | <b>2,52</b> | <b>27,6</b> | <b>5,52</b> | <b>2,76</b> | <b>24,2</b> | <b>4,85</b> | <b>2,43</b> |
| Min:       | <b>0,012</b> | <b>0,87</b> | <b>0,17</b> | <b>0,09</b> | <b>1,21</b> | <b>0,24</b> | <b>0,12</b> | <b>3,38</b> | <b>0,68</b> | <b>0,34</b> | <b>7,64</b> | <b>1,53</b> | <b>0,76</b> |
| Max:       | <b>0,039</b> | <b>82,3</b> | <b>16,5</b> | <b>8,23</b> | <b>136</b>  | <b>27,3</b> | <b>13,6</b> | <b>59,1</b> | <b>11,8</b> | <b>5,91</b> | <b>73,6</b> | <b>14,7</b> | <b>7,36</b> |
| Median:    | <b>0,021</b> | <b>10,4</b> | <b>2,06</b> | <b>1,03</b> | <b>14,6</b> | <b>2,93</b> | <b>1,46</b> | <b>23,5</b> | <b>4,72</b> | <b>2,36</b> | <b>20,9</b> | <b>4,19</b> | <b>2,09</b> |

## References

- (1) Schenzel, J.; Schwarzenbach, R. P.; Bucheli, T. D. Multi-residue screening method to quantify mycotoxins in aqueous environmental samples. *J. Agric. Food Chem.* **2010**, *58*, 11207–11217. DOI: 10.1021/jf102737q.
- (2) Gracia-Lor, E.; Zuccato, E.; Hernández, F.; Castiglioni, S. Wastewater-based epidemiology for tracking human exposure to mycotoxins. *J. Hazard. Mater.* **2020**, *382*, 121108. DOI: <https://doi.org/10.1016/j.jhazmat.2019.121108>.
- (3) Gromadzka, K.; Waśkiewicz, A.; Goliński, P.; Świetlik, J. Occurrence of estrogenic mycotoxin – zearalenone in aqueous environmental samples with various nom content. *Water Res.* **2009**, *43*, 1051–1059. DOI: <https://doi.org/10.1016/j.watres.2008.11.042>.
- (4) Gromadzka, K.; Waśkiewicz, A.; Świetlik, J.; Bocianowski, J.; Goliński, P. The role of wastewater treatment in reducing pollution of surface waters with zearalenone / uloga pročišćavanja otpadnih voda u smanjenju onečišćenja površinskih voda zearalenonom. *Arch. Ind. Hyg. Toxicol.* **2015**, *66*, 159–164. DOI: [doi:10.1515/aiht-2015-66-2606](https://doi.org/10.1515/aiht-2015-66-2606).
- (5) Wettstein, F. E.; Bucheli, T. D. Poor elimination rates in waste water treatment plants lead to continuous emission of deoxynivalenol into the aquatic environment. *Water Res.* **2010**, *44*, 4137–4142. DOI: <https://doi.org/10.1016/j.watres.2010.05.038>.
- (6) Schenzel, J.; Forrer, H. R.; Vogelgsang, S.; Hungerbühler, K.; Bucheli, T. D. Mycotoxins in the environment: i. production and emission from an agricultural test field. *Environ. Sci. Technol.* **2012**, *46*, 13067–13075. DOI: 10.1021/es301557m.
- (7) Kolpin, D. W.; Schenzel, J.; Meyer, M. T.; Phillips, P. J.; Hubbard, L. E.; Scott, T.-M.; Bucheli, T. D. Mycotoxins: diffuse and point source contributions of natural contaminants of emerging concern to streams. *Sci. Total Environ.* **2014**, *470–471*, 669–676. DOI: <https://doi.org/10.1016/j.scitotenv.2013.09.062>.
- (8) Srey, C.; Kimanya, M. E.; Routledge, M. N.; Shirima, C. P.; Gong, Y. Y. Deoxynivalenol exposure assessment in young children in tanzania. *Mol. Nutr. Food Res.* **2014**, *58*, 1574–1580. DOI: <https://doi.org/10.1002/mnfr.201400012>.
- (9) Warensjö Lemming, E.; Montano Montes, A.; Schmidt, J.; Cramer, B.; Humpf, H. U.; Moraes, L.; Olsen, M. Mycotoxins in blood

- and urine of swedish adolescents—possible associations to food intake and other background characteristics. *Mycotoxin Res.* **2020**, *36*, 193–206. DOI: 10.1007/s12550-019-00381-9.
- (10) Eriksen, G. S.; Knutsen, H. K.; Sandvik, M.; Brantsæter, A.-L. Urinary deoxynivalenol as a biomarker of exposure in different age, life stage and dietary practice population groups. *Environ. Int.* **2021**, *157*, 106804. DOI: <https://doi.org/10.1016/j.envint.2021.106804>.
- (11) Turner, P.; White, K.; Burley, V.; Hopton, R.; Rajendram, A.; Fisher, J.; Cade, J.; Wild, C. A comparison of deoxynivalenol intake and urinary deoxynivalenol in uk adults. *Biomarkers* **2010**, *15*, 553–562. DOI: 10.3109/1354750X.2010.495787.
- (12) Ok, H. E.; Kim, H. J.; Cho, T. Y.; Oh, K. S.; Chun, H. S. Determination of deoxynivalenol in cereal-based foods and estimation of dietary exposure. *J. Toxicol. Environ. Health. A* **2009**, *72*, 1424–1430. DOI: 10.1080/15287390903212832.
